# Supplementary material
Source: MDPI journal article supplement (https://www.mdpi.com/2073-4344/12/8/841)
Supplement: s1 [file s1]

## Supporting information

### Hydrogenation of xylose to xylitol in the presence of bimetallic nanoparticles $\text{Ni}_3\text{Fe}$ catalyst in the presence of choline chloride

Naseeb Ullah, François Jérôme, Karine De Oliveira Vigier\*

Institut de chimie des milieux et des matériaux de Poitiers (IC2MP),  
Université de Poitiers, UMR 7285 CNRS, 1, rue Marcel Doré, 86073  
Poitiers cedex 9, France

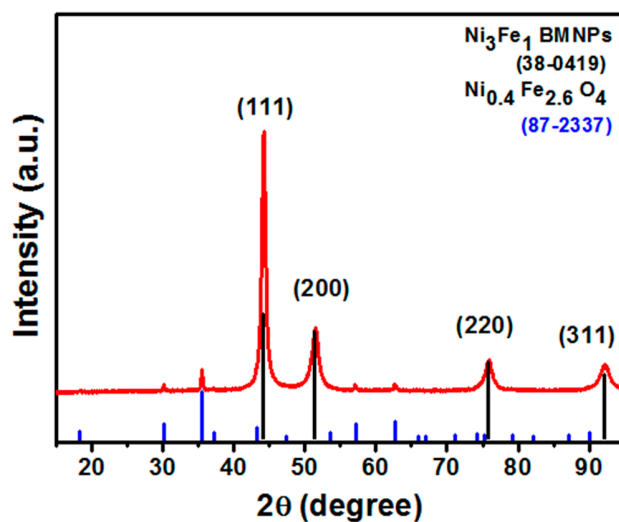

**Figure S1** X-ray diffraction (XRD) pattern of as-synthesized  $\text{Ni}_3\text{Fe}_1$  BMNPs.
